# Supplementary material for: Immunological analyses reveal an immune subtype of uveal melanoma with a poor prognosis
Source: publisher site journal article supplement (doi:10.18632/aging.102693), 2020-01-18
Supplement: Supplementary file [file aging-v12i2-102693-supplementary-material-SD1.pdf]

SUPPLEMENTARY FIGURES

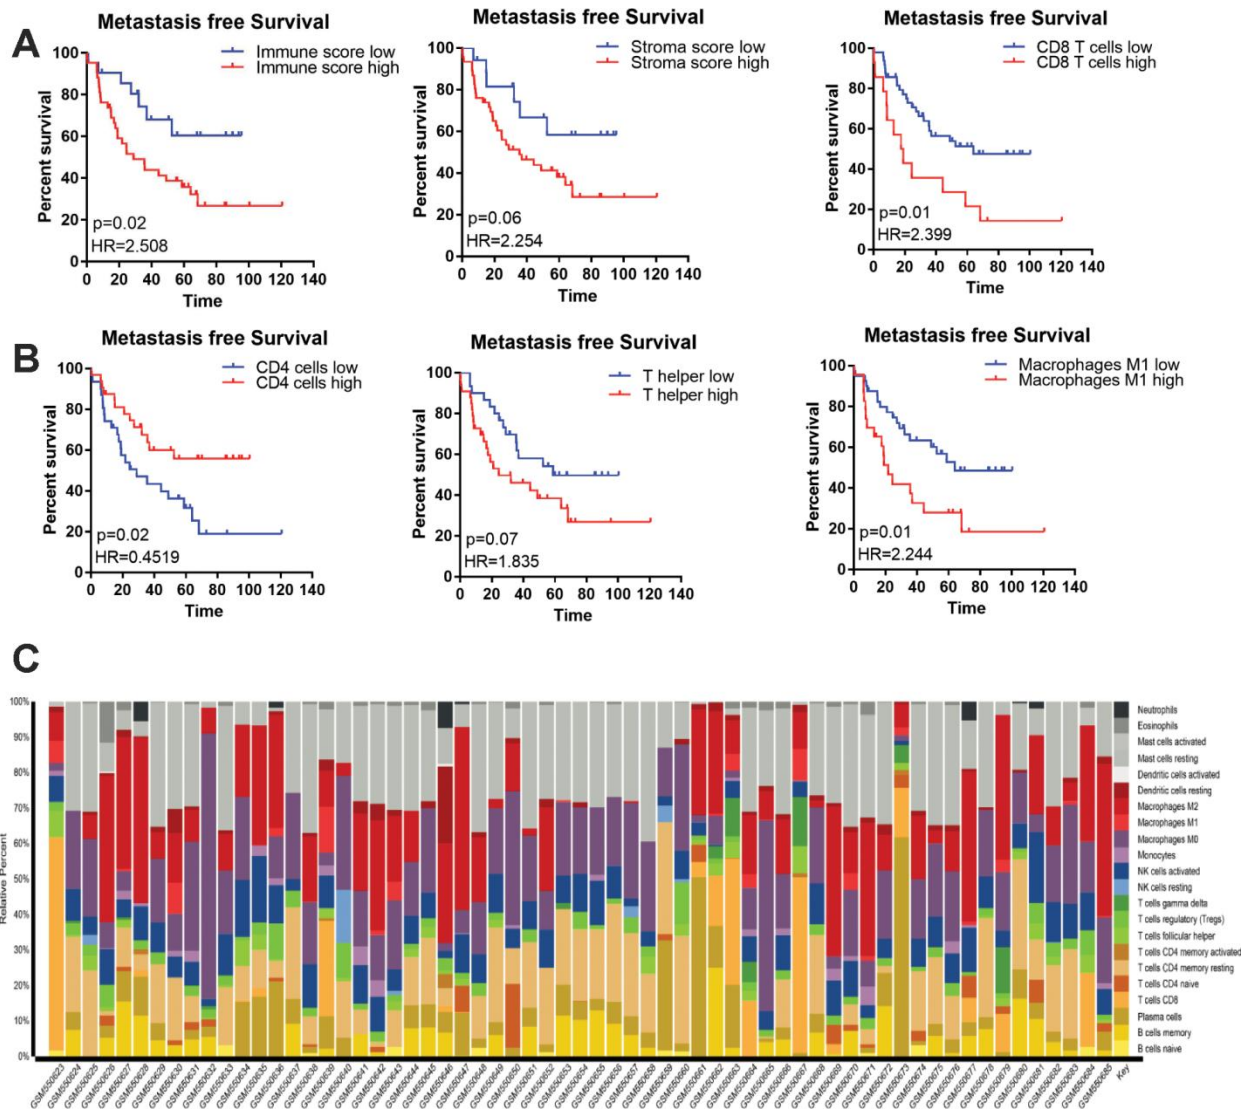

**Supplementary Figure 1. The prognostic value of immune cell types in the Laurent UM dataset. (A)** Kaplan-Meier survival analysis based on the immune score and stromal score. Patients were divided into high and low groups based on their value for each score. **(B)** Kaplan-Meier survival analysis based on immune cell types. Patients were divided into high and low groups based on their expression of each cell type. **(C)** The results of CIBERSORT in the Laurent UM dataset. n=63.

**A**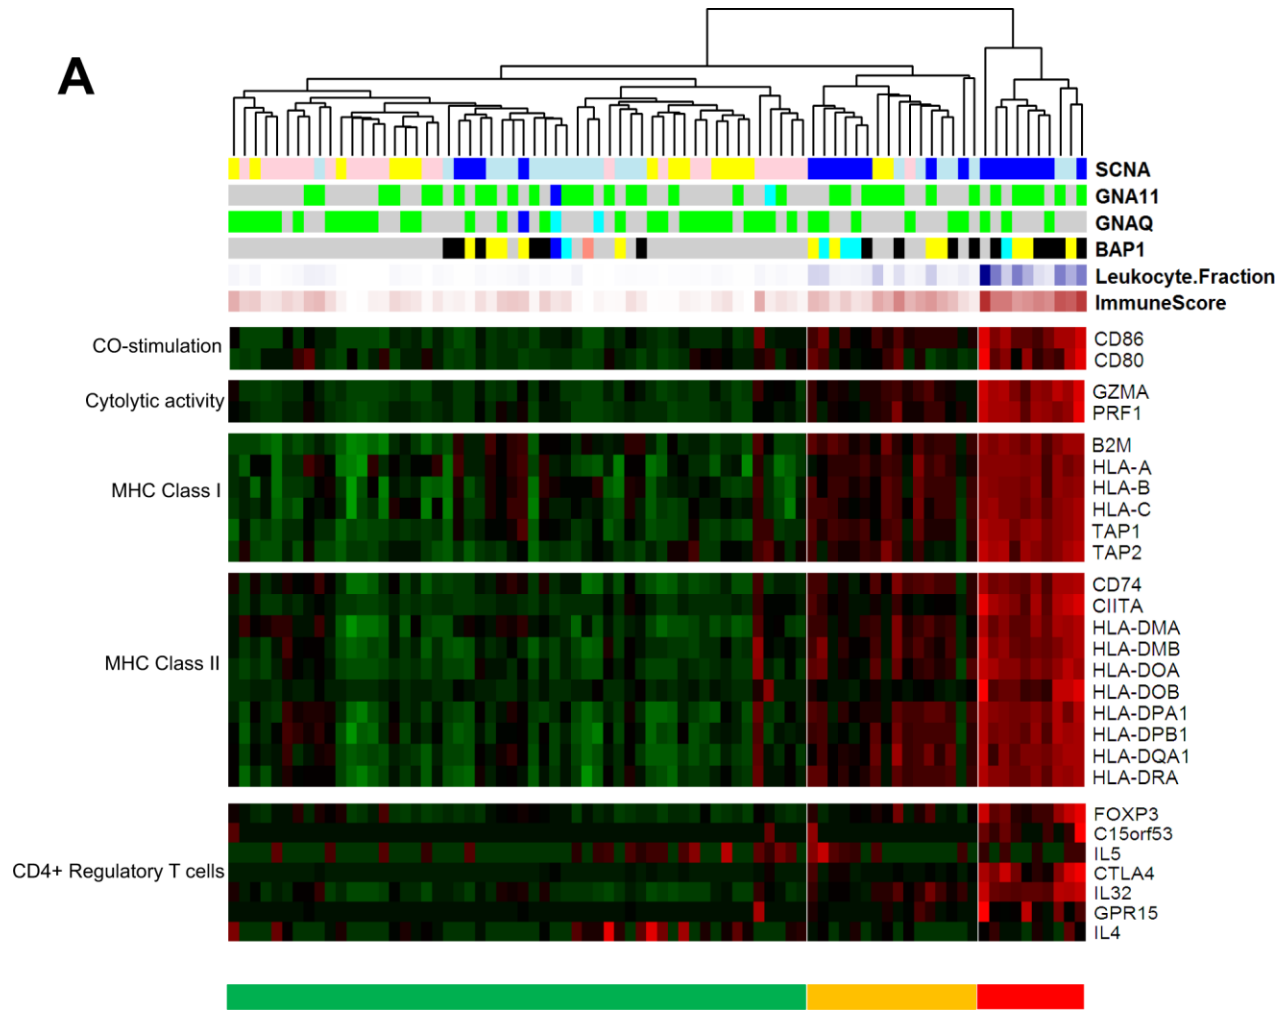

**Supplementary Figure 2. Immune-related gene expression in the UM dataset of TCGA.** (A) Hierarchical clustering of 80 tumors based on selected gene signatures or genes is shown.

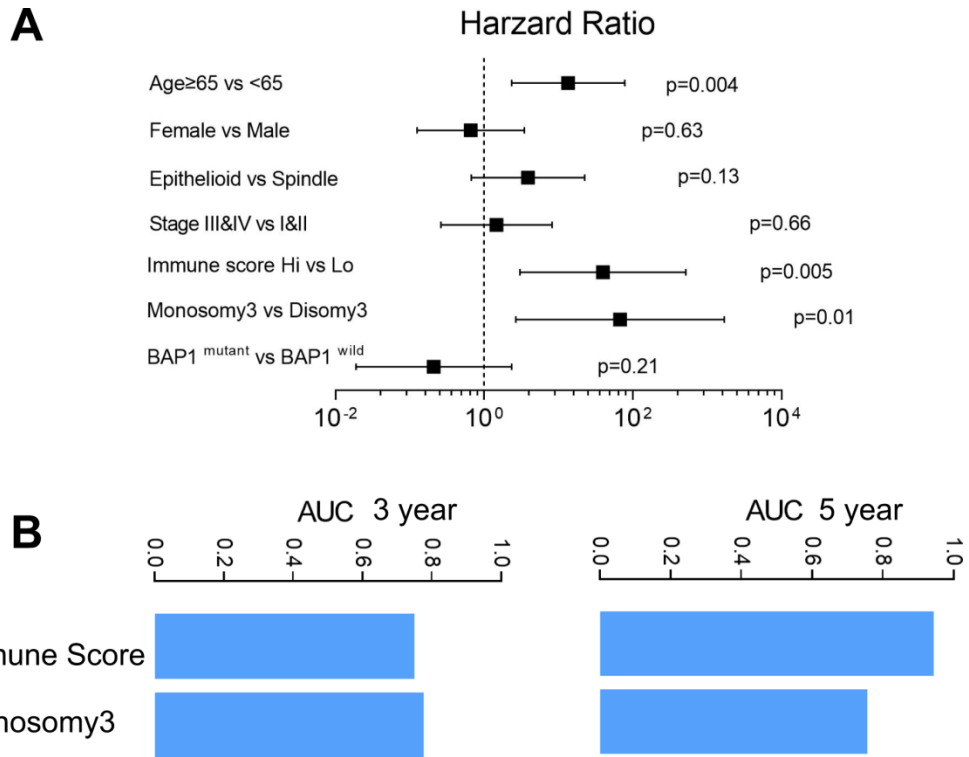

**Supplementary Figure 3. The prognostic power of the immune score in the UM dataset of TCGA. (A)** HRs based on various clinical features in all patients; the horizontal bars represent the 95% confidence intervals of the HRs. Statistically significant variables are shown. **(B)** Area under the curve for the immune score and M3 in predicting survival among UM patients in TCGA.

### Laurent uveal melanoma

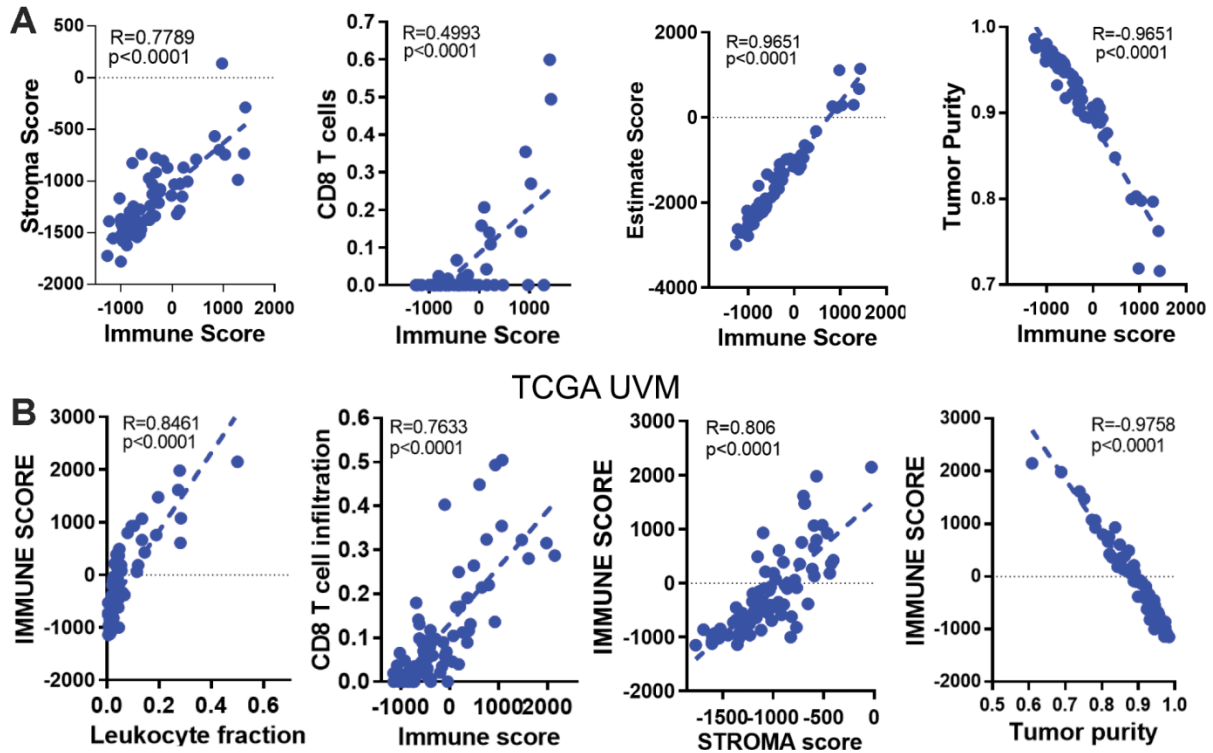

**Supplementary Figure 4. The correlation between the immune score and immune cell infiltration in UM.** (A) Correlations among the estimate score, CD8 T cell infiltration, stromal score, tumor purity and immune score in the GSE22138 dataset. (B) Correlations among CD8 T cell infiltration, the stromal score, tumor purity and the immune score in the UM dataset of TCGA.
